# Supplementary material for: Toxicity, Response and Survival in Older Patients with Metastatic Melanoma Treated with Checkpoint Inhibitors
Source: MDPI journal article supplement (doi:10.3390/cancers13112826), 2021-06-05
Supplement: s1 [file s1]

## Supplemental files

**Supplemental table S1: specific toxicities (grade ≥3) of checkpoint inhibitors per age-group**

|                                    | All patients |        | Patients aged 65-74 |        | Patients aged 75 or older |        | p-value |
|------------------------------------|--------------|--------|---------------------|--------|---------------------------|--------|---------|
|                                    | N            | (%)*   | N                   | (%)    | N                         | (%)    |         |
| <b>Anti-PD-1 treatment (N=920)</b> |              |        |                     |        |                           |        |         |
| All toxicity (grade ≥3)*           | 140          | (15.2) | 67                  | (13.9) | 73                        | (16.6) | 0.255   |
| Specific toxicity (grade ≥3)*      |              |        |                     |        |                           |        |         |
| Bone marrow suppression            | 2            | (0.2)  | 0                   | (0.0)  | 2                         | (0.5)  | 0.138   |
| Neuropathy                         | 3            | (0.3)  | 1                   | (0.2)  | 2                         | (0.5)  | 0.510   |
| Colitis                            | 26           | (2.8)  | 11                  | (2.3)  | 15                        | (3.4)  | 0.302   |
| Kidney function deterioration      | 10           | (1.1)  | 6                   | (1.2)  | 4                         | (0.9)  | 0.623   |
| Nephritis                          | 15           | (1.6)  | 7                   | (1.5)  | 8                         | (1.8)  | 0.661   |
| Dyspnea                            | 7            | (0.8)  | 4                   | (0.8)  | 3                         | (0.7)  | 0.796   |
| Pneumonitis                        | 16           | (1.7)  | 5                   | (1.0)  | 11                        | (2.5)  | 0.089   |
| Adrenal gland insufficiency        | 3            | (0.3)  | 3                   | (0.6)  | 0                         | (0.0)  | 0.097   |
| Hypopituitary insufficiency        | 3            | (0.3)  | 2                   | (0.4)  | 1                         | (0.2)  | 0.617   |
| Hypo (or hyper) thyroidism         | 3            | (0.3)  | 2                   | (0.4)  | 1                         | (0.2)  | 0.617   |
| Fatigue                            | 5            | (0.5)  | 3                   | (0.6)  | 2                         | (0.5)  | 0.729   |
| Rash                               | 10           | (1.1)  | 6                   | (1.2)  | 4                         | (0.9)  | 0.623   |
| Pruritis                           | 4            | (0.4)  | 2                   | (0.4)  | 2                         | (0.5)  | 0.927   |
| Vitiligo                           | 4            | (0.4)  | 2                   | (0.4)  | 2                         | (0.5)  | 0.927   |
| Hepatitis                          | 20           | (2.2)  | 9                   | (1.9)  | 11                        | (2.5)  | 0.510   |
| Other                              | 53           | (5.8)  | 30                  | (6.2)  | 23                        | (5.2)  | 0.516   |
| <b>Ipilimumab</b>                  |              |        |                     |        |                           |        |         |
| All toxicity (grade ≥3)*           | 115          | (31.6) | 75                  | (31.9) | 40                        | (31.0) | 0.859   |
| Specific toxicity (grade ≥3)*      |              |        |                     |        |                           |        |         |
| Bone marrow suppression            | 2            | (0.5)  | 1                   | (0.5)  | 1                         | (0.4)  | 0.666   |
| Colitis                            | 50           | (13.7) | 31                  | (13.2) | 19                        | (14.7) | 0.684   |

|                               |    |        |    |        |    |        |       |
|-------------------------------|----|--------|----|--------|----|--------|-------|
| Skin toxicity                 | 7  | (1.9)  | 1  | (0.4)  | 6  | (4.7)  | 0.005 |
| Adrenal gland insufficiency   | 12 | (3.3)  | 8  | (3.4)  | 4  | (3.1)  | 0.877 |
| Hypopituitary insufficiency   | 23 | (6.3)  | 18 | (7.7)  | 5  | (3.9)  | 0.156 |
| Hypo (or hyper) thyroidism    | 11 | (3.0)  | 9  | (3.8)  | 2  | (1.6)  | 0.224 |
| Hepatitis                     | 13 | (3.6)  | 10 | (4.3)  | 3  | (2.3)  | 0.343 |
| Other                         | 33 | (9.1)  | 19 | (8.1)  | 14 | (10.9) | 0.379 |
| <b>Ipilimumab + nivolumab</b> |    |        |    |        |    |        |       |
| All toxicity (grade ≥3)*      | 86 | (42.8) | 59 | (41.0) | 27 | (47.4) | 0.409 |
| Specific toxicity (grade ≥3)* |    |        |    |        |    |        |       |
| Bone marrow suppression       | 2  | (1.0)  | 1  | (0.7)  | 1  | (1.8)  | 0.495 |
| Neuropathy                    | 2  | (1.0)  | 2  | (1.4)  | 0  | (0.0)  | 0.371 |
| Colitis                       | 26 | (12.9) | 18 | (12.5) | 8  | (14.0) | 0.770 |
| Nephritis                     | 8  | (4.0)  | 3  | (2.1)  | 5  | (8.8)  | 0.029 |
| Pneumonitis                   | 8  | (4.0)  | 3  | (2.1)  | 5  | (8.8)  | 0.029 |
| Adrenal gland insufficiency   | 6  | (3.0)  | 3  | (2.1)  | 3  | (5.3)  | 0.232 |
| Hypopituitary insufficiency   | 5  | (2.5)  | 4  | (2.8)  | 1  | (1.8)  | 0.675 |
| Hypo (or hyper) thyroidism    | 2  | (1.0)  | 1  | (0.7)  | 1  | (1.8)  | 0.495 |
| Rash                          | 5  | (2.5)  | 4  | (2.8)  | 1  | (1.8)  | 0.675 |
| Pruritis                      | 2  | (1.0)  | 2  | (1.4)  | 0  | (0.0)  | 0.371 |
| Hepatitis                     | 21 | (10.4) | 16 | (11.1) | 5  | (8.8)  | 0.625 |
| Other                         | 21 | (10.4) | 16 | (11.1) | 5  | (8.8)  | 0.625 |

---

*\*presented percentages include only patients who received the therapy that is mentioned*

---

**Supplemental table S2: Reasons for discontinuation of treatment (first line)**

|                                           | All patients |        | 65-74 |        | 75+ |        | <i>p-value</i> |
|-------------------------------------------|--------------|--------|-------|--------|-----|--------|----------------|
|                                           | n            | (%)    | n     | (%)    | n   | (%)    |                |
| Reasons for stopping anti-PD              |              |        |       |        |     |        | 0.026          |
| Planned                                   | 105          | (15.4) | 61    | (18.2) | 44  | (12.7) |                |
| Progression                               | 270          | (39.6) | 149   | (44.5) | 121 | (35.0) |                |
| Toxicity                                  | 102          | (15.0) | 41    | (12.2) | 61  | (17.6) |                |
| Choice of patient                         | 18           | (2.6)  | 7     | (2.1)  | 11  | (3.2)  |                |
| Bad condition of patient                  | 32           | (4.7)  | 13    | (3.9)  | 19  | (5.5)  |                |
| Death                                     | 13           | (1.9)  | 5     | (1.5)  | 8   | (2.3)  |                |
| Other                                     | 30           | (4.4)  | 12    | (3.6)  | 18  | (5.2)  |                |
| Unknown                                   | 111          | (16.3) | 47    | (14.0) | 64  | (18.5) |                |
| Reasons for stopping ipilimumab           |              |        |       |        |     |        | <0.001         |
| Planned                                   | 123          | (59.4) | 78    | (56.9) | 45  | (64.3) |                |
| Progression                               | 39           | (18.8) | 35    | (25.5) | 4   | (5.7)  |                |
| Toxicity                                  | 29           | (14.0) | 20    | (14.6) | 9   | (12.9) |                |
| Bad condition of patient                  | 9            | (4.3)  | 2     | (1.5)  | 7   | (10.0) |                |
| Death                                     | 4            | (1.9)  | 1     | (0.7)  | 3   | (4.3)  |                |
| Other                                     | 2            | (1.0)  | 1     | (0.7)  | 1   | (1.4)  |                |
| Unknown                                   | 1            | (0.5)  | 0     | (0.0)  | 1   | (1.4)  |                |
| Reasons for stopping ipilimumab/nivolumab |              |        |       |        |     |        | 0.182          |
| Planned                                   | 15           | (7.5)  | 12    | (8.3)  | 3   | (5.3)  |                |
| Progression                               | 47           | (23.4) | 40    | (27.8) | 7   | (12.3) |                |
| Toxicity                                  | 75           | (37.3) | 51    | (35.4) | 24  | (42.1) |                |
| Patients' choice                          | 3            | (8.0)  | 2     | (1.4)  | 1   | (1.8)  |                |
| Bad condition of patient                  | 16           | (8.0)  | 9     | (6.3)  | 7   | (12.3) |                |
| Death                                     | 16           | (8.0)  | 9     | (6.3)  | 7   | (12.3) |                |
| Other                                     | 4            | (2.0)  | 2     | (1.4)  | 2   | (3.5)  |                |
| Unknown                                   | 25           | (12.4) | 19    | (13.2) | 6   | (10.5) |                |

### **Supplemental table S3: Hospital admissions**

|                          | All patients |        | 65-74 |        | 75+  |        |                  |
|--------------------------|--------------|--------|-------|--------|------|--------|------------------|
|                          | N            | (%)    | N     | (%)    | N    | (%)    | <i>p-value</i>   |
| Admitted (any time)      | 1233         | (55.6) | 668   | (58.6) | 565  | (52.4) | <i>0.003</i>     |
| Mean nr admissions (SE)  | 3.6          | (0.22) | 3.7   | (0.23) | 3.3  | (0.22) | <i>0.263</i>     |
| Reasons for admission*   |              |        |       |        |      |        |                  |
| toxicity of treatment    | 1880         | (24.2) | 1077  | (25.7) | 803  | (22.4) | <i>&lt;0.001</i> |
| toxicity other treatment | 138          | (1.8)  | 111   | (2.6)  | 27   | (0.8)  |                  |
| surgical complications   | 114          | (1.5)  | 64    | (1.5)  | 50   | (1.4)  |                  |
| palliative care          | 2312         | (29.8) | 1243  | (29.7) | 1069 | (29.8) |                  |
| other                    | 3316         | (42.7) | 1685  | (40.2) | 1631 | (45.5) |                  |
| unknown                  | 10           | (0.1)  | 6     | (0.1)  | 4    | (0.1)  |                  |

*\*patients could be admitted more than once. Presented percentages represent the percentage of all admissions explained by the specified reason*

**Supplemental table S4: Characteristics of patients discontinuing treatment due to toxicity**  
**Anti-PD1**

|                          | Discontinuation due to toxicity |        | Other reason for discontinuation |        | Unknown or no discontinuation |        | <i>p-value</i> |
|--------------------------|---------------------------------|--------|----------------------------------|--------|-------------------------------|--------|----------------|
| Age                      | N                               | %      | N                                | %      | N                             | %      | 0.006          |
| 65-74                    | 40                              | (41.2) | 242                              | (53.5) | 53                            | (40.2) |                |
| 75+                      | 57                              | (58.8) | 210                              | (46.5) | 79                            | (59.8) |                |
| Number of comorbidities  |                                 |        |                                  |        |                               |        |                |
| 0                        | 11                              | (11.3) | 46                               | (10.2) | 14                            | (10.6) | 0.767          |
| 1-2                      | 39                              | (40.2) | 199                              | (44.0) | 63                            | (47.7) |                |
| 3 or more                | 43                              | (44.3) | 197                              | (43.6) | 50                            | (37.9) |                |
| Unknown                  | 4                               | (4.1)  | 10                               | (2.2)  | 5                             | (3.8)  |                |
| WHO classification       |                                 |        |                                  |        |                               |        |                |
| 0                        | 47                              | (48.5) | 222                              | (49.1) | 68                            | (51.5) | 0.762          |
| 1                        | 33                              | (34.0) | 160                              | (35.4) | 42                            | (31.8) |                |
| 2                        | 10                              | (10.3) | 38                               | (8.4)  | 8                             | (6.1)  |                |
| 3 or 4                   | 0                               | (0.0)  | 6                                | (1.3)  | 2                             | (1.5)  |                |
| Unknown                  | 7                               | (7.2)  | 26                               | (5.8)  | 12                            | (9.1)  |                |
| Response within 6 months |                                 |        |                                  |        |                               |        |                |
| No                       | 286                             | (63.3) | 42                               | (43.3) | 67                            | (50.8) | <0.001         |
| Yes                      | 166                             | (36.7) | 55                               | (56.7) | 65                            | (49.2) |                |

**Supplemental table S5: predictors of overall survival**

|                               | Univariate |             |                  | Multivariate |             |                  |
|-------------------------------|------------|-------------|------------------|--------------|-------------|------------------|
|                               | HR         | (95% C.I.)  | <i>p-value</i>   | HR           | (95% C.I.)  | <i>p-value</i>   |
| Age                           |            |             |                  |              |             |                  |
| 65-74                         | Ref        |             | <i>&lt;0.001</i> | Ref          |             | <i>0.002</i>     |
| 75+                           | 1.22       | (1.1-1.35)  |                  | 1.18         | (1.06-1.31) |                  |
| Sex                           |            |             |                  |              |             |                  |
| Male                          | Ref        |             | <i>0.510</i>     | Ref          |             | <i>0.718</i>     |
| Female                        | 0.97       | (0.87-1.07) |                  | 0.98         | (0.88-1.09) |                  |
| Number of comorbidities       |            |             |                  |              |             |                  |
| 0                             | Ref        |             | <i>0.001</i>     | Ref          |             | <i>0.315</i>     |
| 1-2                           | 1.10       | (0.94-1.29) |                  | 1.08         | (0.92-1.27) |                  |
| 3 or more                     | 1.33       | (1.13-1.56) |                  | 1.15         | (0.98-1.35) |                  |
| Unknown                       | 1.08       | (0.73-1.61) |                  | 1.28         | (0.86-1.91) |                  |
| WHO classification            |            |             |                  |              |             |                  |
| 0                             | Ref        |             | <i>&lt;0.001</i> | Ref          |             | <i>&lt;0.001</i> |
| 1                             | 1.80       | (1.58-2.04) |                  | 1.50         | (1.32-1.71) |                  |
| 2                             | 2.99       | (2.54-3.52) |                  | 2.23         | (1.89-2.64) |                  |
| 3 or 4                        | 6.10       | (4.90-7.59) |                  | 3.48         | (2.77-4.37) |                  |
| Unknown                       | 2.17       | (1.85-2.56) |                  | 2.02         | (1.70-2.39) |                  |
| <b>Tumour characteristics</b> |            |             |                  |              |             |                  |
| Number of metastatic sites    |            |             |                  |              |             |                  |
| 1-2                           | Ref        |             | <i>&lt;0.001</i> | Ref          |             | <i>0.088</i>     |
| 3-5                           | 1.15       | (0.89-1.47) |                  | 1.24         | (0.97-1.60) |                  |
| 6 or more                     | 2.27       | (1.90-2.72) |                  | 2.17         | (1.80-2.62) |                  |
| Unknown                       | 1.28       | (1.03-1.60) |                  | 1.29         | (1.03-1.62) |                  |
| LDH                           |            |             |                  |              |             |                  |

|                  |      |             |        |      |             |        |
|------------------|------|-------------|--------|------|-------------|--------|
| Normal           | Ref  |             | <0.001 | Ref  |             | <0.001 |
| Elevated         | 2.02 | (1.81-2.24) |        | 1.64 | (1.47-1.83) |        |
| Unknown          | 1.44 | (1.19-1.74) |        | 1.22 | (1.00-1.49) |        |
| Brain metastases |      |             |        |      |             |        |
| No               | Ref  |             | <0.001 | Ref  |             | <0.001 |
| Yes              | 1.79 | (1.60-2.00) |        | 1.56 | (1.39-1.75) |        |
| Unknown          | 1.72 | (1.29-2.30) |        | 1.63 | (1.21-2.19) |        |

---
